# Supplementary material
Source: PubMed Central journal article supplement (PMC5516787)
Supplement: ic7b01037_si_001.pdf [file ic7b01037_si_001.pdf]

# Supporting Information

A Ruthenium(II) Complex as a Luminescent Probe for  
DNA Mismatches and Abasic Sites

Adam N. Boynton, Lionel Marcélis, Anna J. McConnell, and Jacqueline K. Barton\*

Division of Chemistry and Chemical Engineering  
California Institute of Technology, Pasadena, California, 91125

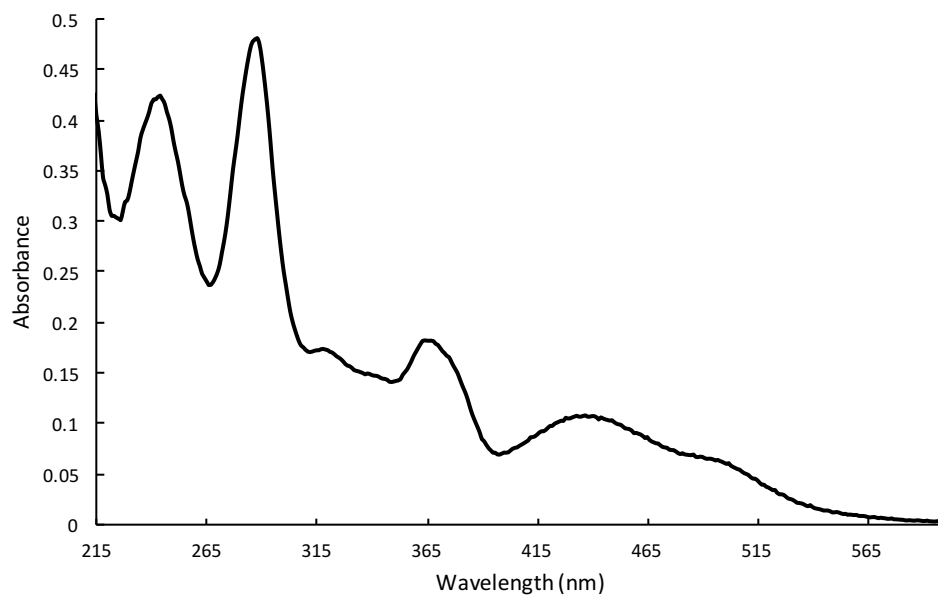

**Figure S1:** UV-Visible spectrum of  $[\text{Ru}(\text{bpy})_2(\text{BNIQ})]^{2+}$  ( $6 \mu\text{M}$  in  $\text{H}_2\text{O}$ ).

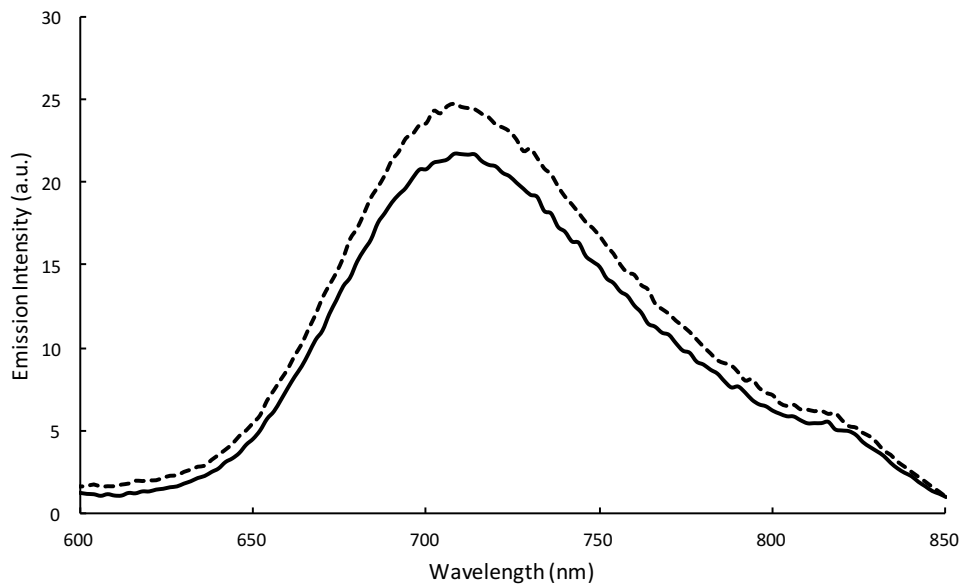

**Figure S2:** Steady-state emission spectra of  $[\text{Ru}(\text{bpy})_2(\text{BNIQ})]^{2+}$  in aerated (solid line) and deoxygenated (*via* argon bubbling, dotted line) solutions ( $6 \mu\text{M}$  in  $\text{H}_2\text{O}$ ,  $\lambda_{\text{ex}} = 440 \text{ nm}$ ).

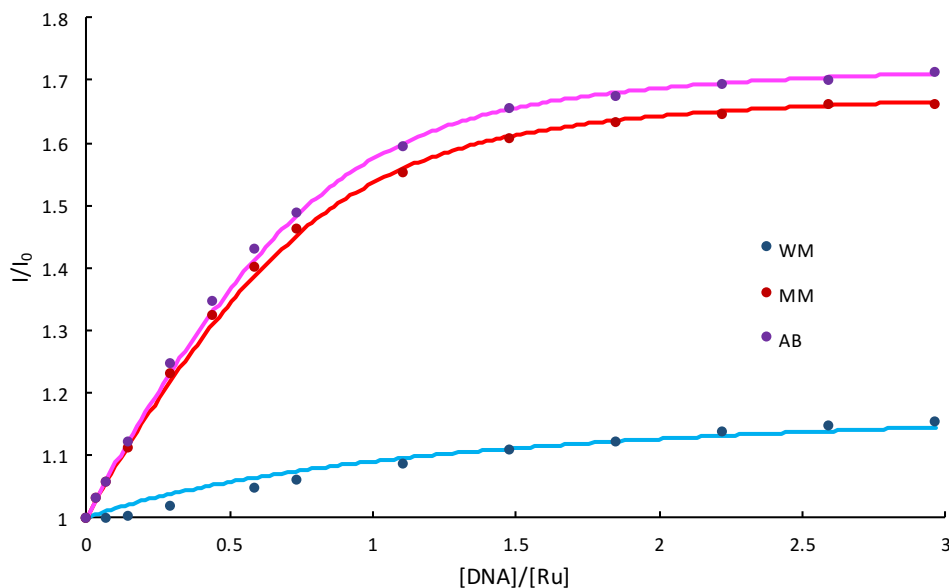

**Figure S3:** Steady-state luminescence titrations of  $[\text{Ru}(\text{bpy})_2(\text{BNIQ})]^{2+}$  with well-matched (blue), mismatched (red), and abasic (pink) DNA. Samples were prepared in 5 mM Tris, 200 mM NaCl, pH 7.5.  $[\text{Ru}] = 4 \mu\text{M}$ ,  $\lambda_{\text{ex}} = 440 \text{ nm}$ .  $[\text{DNA}]$  reflects the concentration of full sequence. Emission spectra were integrated from 590-850 nm.

Binding affinities of the complex for well-matched, mismatched, and abasic sites were evaluated by a global fitting process using a modified McGhee-Von Hippel method.<sup>1</sup> Briefly, we consider the equilibrium binding ( $K_{\text{ass}}$ ) of the complex ( $C$ ) to well-matched base pair sites ( $\text{BP}$ ) and the equilibrium binding ( $K_{\text{MM}}$ ) to a mismatch (or abasic) site ( $\text{MM}$ ):

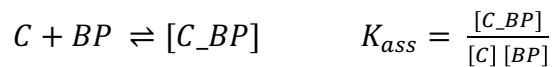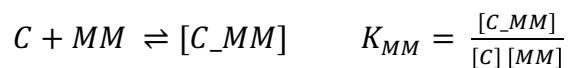

As described previously,<sup>2</sup> we can express the luminescence intensity ( $I$ ) as a function of these equilibria along with other parameters, defined below.

$$I = \alpha \frac{K_{ass} C_C n (1 - x) R f}{1 + K_{ass} C_C p f} + \beta \frac{K_{MM} C_C n x R f}{1 + K_{ass} C_C f}$$

In this equation for  $I$ ,  $C_C$  is the total concentration of complex;  $R$  is the ratio of total DNA duplex concentration to  $C_C$ ;  $f$  is the molar fraction of free complex;  $n$  is the number of base pairs per DNA duplex;  $x$  is the ratio of mismatched to well-matched sites in the duplex; and  $p$  is the occupational factor. Important to note are  $\alpha$  and  $\beta$ , which represent the the emissivities of the complex when bound to a well-matched or mismatched site, respectively, relative to free complex.

The global fitting on the three data sets is performed (occupational factor set to 2) and yields the values of  $K_a = 7.3 \cdot 10^3 \text{ M}^{-1}$  per well-matched base pair,  $K_a = 3.5 \cdot 10^6 \text{ M}^{-1}$  per CC mismatch site, and  $K_a = 3.8 \cdot 10^6 \text{ M}^{-1}$  per abasic site. The emissivities for the complex associated with these sites, relative to the luminescence of the free complex, are estimated to be 1.36, 1.42 and 1.46 for well-matched, mismatched, and abasic sites, respectively. The errors are evaluated to be equal to 10%.

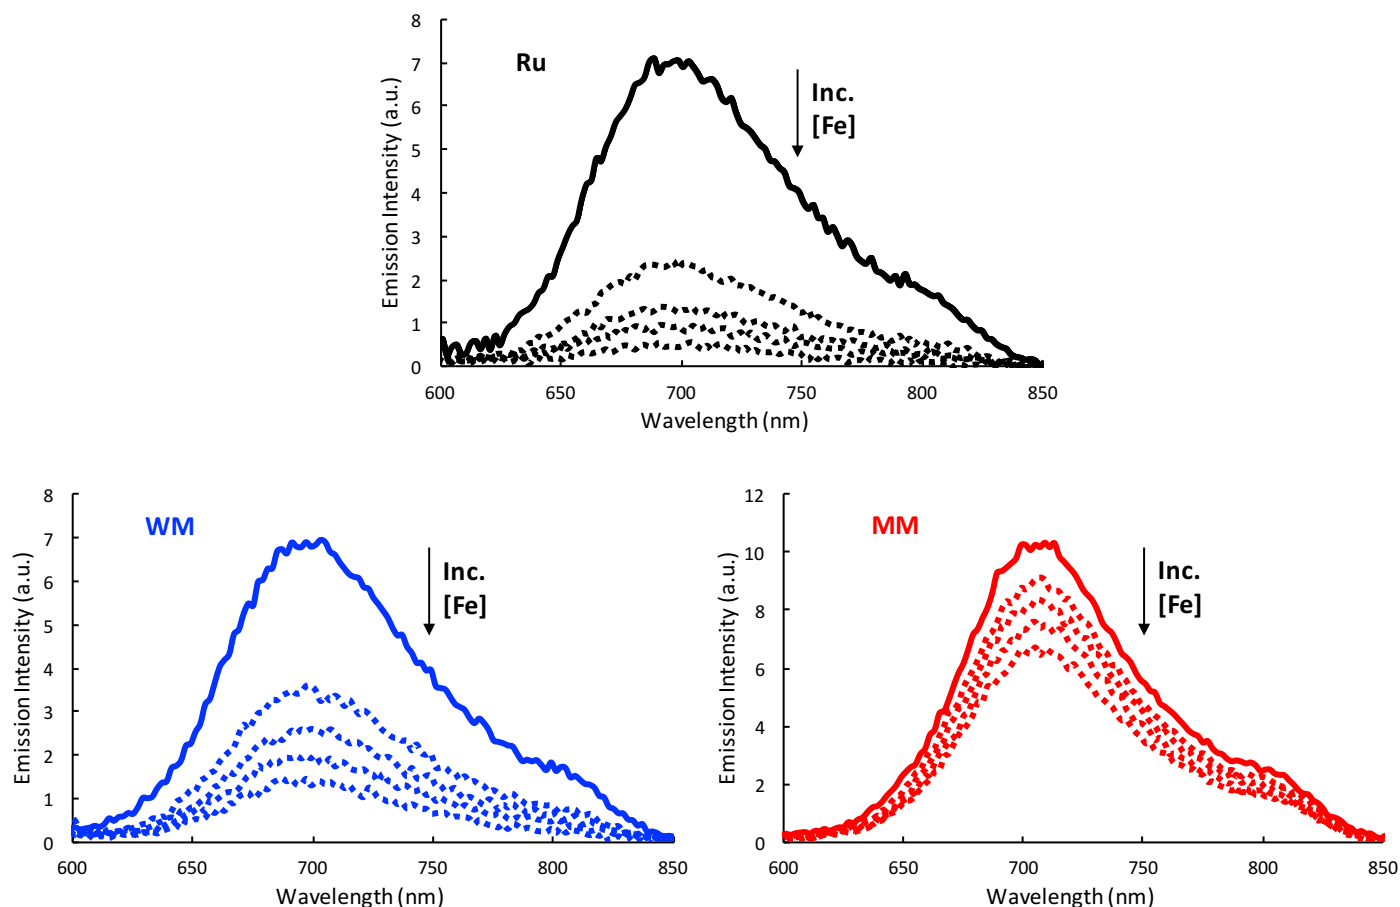

**Figure S4:** Ferricyanide quenching of free  $[\text{Ru}(\text{bpy})_2(\text{BNIQ})]^{2+}$  (black) and in the presence of well-matched DNA (blue) and mismatched DNA (red). Ferricyanide was added (dotted lines) to concentrations of 1.2, 2.3, 3.5, and 5.6 mM.  $[\text{Ru}] = 2 \mu\text{M}$ ,  $[\text{DNA}] = 4 \mu\text{M}$ ,  $\lambda_{\text{ex}} = 440 \text{ nm}$ . Samples were prepared in 5 mM Tris, 200 mM NaCl, pH 7.5 at 25 °C.

### Supporting References

1. McGhee, J.D.; von Hippel, P.H. Theoretical Aspects of DNA-Protein Interactions: Co-operative and Non-co-operative Binding of Large Ligands to a One-dimensional Homogeneous Lattice. *J. Mol. Biol.* **1974**, *86*, 469-489.
2. Boynton, A.N.; Marcelis, L.; Barton, J.K.  $[\text{Ru}(\text{Me}_4\text{phen})_2(\text{dppz})]^{2+}$ , A Light Switch for DNA Mismatches. *J. Am. Chem. Soc.* **2016**, *138*, 5020-5023.
